# Supplementary material
Source: PubMed Central journal article supplement (PMC10413218)
Supplement: jamapsychiatry-e232706-s002.pdf [file jamapsychiatry-e232706-s002.pdf]

## Supplementary Online Content

Boucher VG, Haight BL, Hives BA, et al. Effects of 12 weeks of at-home, application-based exercise on health care workers' depressive symptoms, burnout, and absenteeism: a randomized clinical trial. *JAMA Psychiatry*. Published online August 9, 2023. doi:10.1001/jamapsychiatry.2023.2706

**eMethods.** Outcomes, Syntax Example, Effect Size Methods, and Software

**eTable 1.** Missingness for Outcome Scales

**eTable 2.** Predicting Number of Missing Surveys per Participant From Baseline Outcome and Sociodemographic Data

**eTable 3.** Biweekly Feingold Treatment Effect Sizes and 95% CIs for Depressive (Primary Outcome) and Burnout Symptoms (Secondary Outcome), Covarying the Effects of Age

**eTable 4.** Biweekly Feingold Treatment Effect Sizes and 95% CIs for Depressive (Primary Outcome) and Burnout Symptoms (Secondary Outcome), Covarying the Effects of Income

**eTable 5.** Weekly Use of Down Dog Apps for All Exercise Condition Participants and by Average Adherence Group Over the Course of the Intervention

**eTable 6.** Predicting Average Weekly Minutes of App Use per Participant From Baseline Outcome and Sociodemographic Data

**eTable 7.** Within Condition Changes Over Time for Depressive Symptoms and for Burnout Symptoms (Cynicism, Exhaustion, Professional Efficacy)

**eTable 8.** Biweekly Average Number of Sick Days

**eTable 9.** Biweekly Effect Sizes for Depressive Symptoms With Use of the Down Dog Apps Over the Course of the Intervention Compared With the Waitlist Control Condition (n = 146)

**eTable 10.** Biweekly Effect Sizes for Burnout Symptoms (Cynicism, Exhaustion, Professional Efficacy) With Use of the Down Dog Apps Compared With the Waitlist Control Condition (n = 146)

**eFigure 1.** Biweekly Effect Sizes for Depressive Symptoms for Participants With Use of the Down Dog Apps Over the Course of the Intervention Compared With the Waitlist Control Condition (n = 146)

**eFigure 2.** Depressive Symptoms Trajectories for Participants With Use of the Down Dog Apps and Waitlist Control Condition Over the Course of the Intervention

**eFigure 3.** Biweekly Effect Sizes for Burnout Symptoms (Cynicism, Exhaustion, Professional Efficacy) for Participants With Use of the Down Dog Apps Over the Course of the Intervention Compared With the Waitlist Control Condition (n = 146)

**eFigure 4.** Trajectories of Burnout Symptoms (Cynicism, Exhaustion, Professional Efficacy) for Participants With Use of the Down Dog Apps and Waitlist Control Condition Over the Course of the Intervention

This supplementary material has been provided by the authors to give readers additional information about their work.

## Outcomes and measures information

### Primary outcome

Depressive symptoms was assessed using the 10-item Center for Epidemiological Studies – Depression Scale (CESD).<sup>1</sup> Each item was scored from 0 ('Rarely or none of the time' [less than 1 day]) to 3 ('Most or all of the time' [5-7 days]) and sum scores were produced (range from 0 to 30), which displayed acceptable internal consistency across each of the data points ( $\alpha \geq 0.80$ ). Higher depressive symptoms scores indicate greater depressive symptoms.

### Secondary outcomes

Burnout symptoms was assessed using the 16-item Maslach Burnout Inventory (MBI),<sup>2</sup> in which items are scored between 0 ('Never') and 6 ('Every day'). The MBI is divided into 3 subscales. These include *cynicism*, or a feeling of indifference, negativity, or mental distance towards one's work. Scores on this subscale can range from 0 to 36, with higher scores indicate greater cynicism. The second dimension is *exhaustion*, which reflects a feeling of mental and physical energy depletion or exhaustion. Scores can potentially range from 0 to 30, with higher scores indicating greater exhaustion. The final dimension of burnout corresponds to *professional efficacy*. This represents the degree to which respondents feel effective (or ineffective) at work. Scores can potentially range from 0 to 36, with higher scores reflecting greater efficacy and lower scores indicating lower efficacy (i.e., higher burnout on this dimension). Scores derived from the MBI have been consistently found to display sound reliability and validity.<sup>2</sup> Week-to-week Cronbach alphas demonstrated strong internal consistency in the *cynicism* (ranged from  $\alpha = 0.86$  and  $\alpha = 0.92$ ), *exhaustion* (ranged from  $\alpha = 0.93$  and  $\alpha = 0.96$ ), and *professional efficacy* (ranged from  $\alpha = 0.79$  and  $\alpha = 0.89$ ) measures.

Absenteeism was measured with a one-item question: "In the past 2 weeks, how many days did you call in sick when you were scheduled to work?". Almost half ( $n=129$ , 45%) of participants reported no sick days at each assessment, with an average 0.23 (0.41) sick days reported throughout the study. as a result, number of days reported absent every two weeks was collapsed into a dichotomous indicator, with '0 = not absent over past two weeks' and '1 = absent over the past two weeks.' Biweekly absenteeism was summed across the 6 assessment timepoints, for a potential range of 0-6.

Stanford Leisure-Time Categorial Activity Item (L-CAT): L-CAT score of 1 to 3 was required for inclusion in the study, which represents activity level below the guidelines of 150 minutes of moderate-to-vigorous activity from the American College of Sports Medicine.<sup>3</sup>

Ethnicity data were collected using the following response options provided by Statistic Canada: Aboriginal decent (e.g., North American Indian, Métis or Inuit (Eskimo), Arab, Asian (e.g., East Indian, Pakistani, Sri Lankan), Black (e.g., African, Haitian, Jamaican, Somali), Chinese, Filipino, Japanese, Korean, Latin American, South Asian (e.g., East Indian, Pakistani, Sri Lankan), South East Asian (e.g., Vietnamese, Cambodian, Malaysian, Laotian), West Asian (e.g., Iranian, Afghan), White, and other (participant specified).

### Reference

- 1.Andresen EM, Malmgren JA, Carter WB, Patrick DL. Screening for depression in well older adults: Evaluation of a short form of the CES-D. *American Journal of Preventive Medicine* 1994; 10(2): 77-84.
- 2.Maslach C, Jackson SE, Leither MP, Schaufeli WB, Schwab RL. *Maslach Burnout Inventory: Fourth edition.*; 2018.
- 3.American College of Sports Medicine, Riebe D, Ehrman JK, Liguori G, Magal M. *ACSM's Guidelines for Exercise Testing and Prescription: Wolters Kluwer;* 2018

## Syntax example for Structural equation modeling model and Effect size methods for depressive symptoms

```
Model_SEM_quad <- '  
i ~ 1*T0 + 1*T2 + 1*T4 + 1*T6 + 1*T8 + 1*T10 + 1*T12  
s ~ 0*T0 + 2*T2 + 4*T4 + 6*T6 + 8*T8 + 10*T10 + 12*T12  
q ~ 0*T0 + 4*T2 + 16*T4 + 36*T6 + 64*T8 + 100*T10 + 144*T12  
i+s+q ~ Group_Exp'
```

```
Dep_model_quad <- growth(Model_SEM_quad, estimator = "MLR", mimic = "Mplus", missing = "ml",  
  em.iter.max = 20000, data = depression.full)
```

```
interpret(Dep_model_quad)  
summary(Dep_model_quad)
```

```
parameterestimates(Dep_model_quad)[c(48, 49, 23, 24),]  
parameterestimates(Dep_model_quad_r)[c(48, 49, 23, 24),]
```

```
ES_Depression_quad <- bind_rows(  
  deltaMethod(coef(Dep_model_quad), level = 0.95, vcov = vcov(Dep_model_quad),  
    "(s~Group_Exp`*2+`q~Group_Exp`*4)/sqrt(`i~i`+`T0~~T0`/2+`T2~~T2`/2)"),  
  deltaMethod(coef(Dep_model_quad), level = 0.95, vcov = vcov(Dep_model_quad),  
    "(s~Group_Exp`*4+`q~Group_Exp`*16)/sqrt(`i~i`+`T0~~T0`/3+`T2~~T2`/3+`T4~~T4`/3)"),  
  deltaMethod(coef(Dep_model_quad), level = 0.95, vcov = vcov(Dep_model_quad),  
    "(s~Group_Exp`*6+`q~Group_Exp`*36)/sqrt(`i~i`+`T0~~T0`/4+`T2~~T2`/4+`T4~~T4`/4+`T6~~T6`/4)"),  
)  
  deltaMethod(coef(Dep_model_quad), level = 0.95, vcov = vcov(Dep_model_quad),  
    "(s~Group_Exp`*8+`q~Group_Exp`*64)/sqrt(`i~i`+`T0~~T0`/5+`T2~~T2`/5+`T4~~T4`/5+`T6~~T6`/5  
+`T8~~T8`/5)"),  
  deltaMethod(coef(Dep_model_quad), level = 0.95, vcov = vcov(Dep_model_quad),  
    "(s~Group_Exp`*10+`q~Group_Exp`*100)/sqrt(`i~i`+`T0~~T0`/6+`T2~~T2`/6+`T4~~T4`/6+`T6~~T6`/6  
+`T8~~T8`/6+`T10~~T10`/6)"),  
  deltaMethod(coef(Dep_model_quad), level = 0.95, vcov = vcov(Dep_model_quad),  
    "(s~Group_Exp`*12+`q~Group_Exp`*144)/sqrt(`i~i`+`T0~~T0`/7+`T2~~T2`/7+`T4~~T4`/7+`T6~~T6`/7  
+`T8~~T8`/7+`T10~~T10`/7+`T12~~T12`/7)"))>%>%  
  mutate(Week = seq(2, 12, 2), Var = "Depression Quad")>%>% tibble()
```

```
Dep_model_quad_PP_compcn <- growth(Model_SEM_linear_4_group, estimator = "MLR", mimic = "Mplus",  
  missing = "ml", em.iter.max = 20000, data = depression.full_4_group)
```

```
parameterestimates(Dep_model_quad_PP_compcn)[c(61, 62, 23, 24, 26, 27, 29, 30),]
```

```
interpret(Dep_model_quad_PP_compcn)
```

```
ES_table_CESD_4_group <- bind_rows(  
  deltaMethod(coef(Dep_model_quad_PP_compcn), level = 0.95, vcov = vcov(Dep_model_quad_PP_compcn),  
    "(s~Group_very_low_active`*2+`q~Group_very_low_active`*4)/sqrt(`i~i`+`T0~~T0`/2+`T2~~T2`/2)"),  
  deltaMethod(coef(Dep_model_quad_PP_compcn), level = 0.95, vcov = vcov(Dep_model_quad_PP_compcn),  
    "(s~Group_very_low_active`*4+`q~Group_very_low_active`*16)/sqrt(`i~i`+`T0~~T0`/3+`T2~~T2`/3+`  
T4~~T4`/3)"),  
  deltaMethod(coef(Dep_model_quad_PP_compcn), level = 0.95, vcov = vcov(Dep_model_quad_PP_compcn),  
    "(s~Group_very_low_active`*6+`q~Group_very_low_active`*36)/sqrt(`i~i`+`T0~~T0`/4+`T2~~T2`/4+`  
T4~~T4`/4+`T6~~T6`/4)"),  
  deltaMethod(coef(Dep_model_quad_PP_compcn), level = 0.95, vcov = vcov(Dep_model_quad_PP_compcn),  
    "(s~Group_very_low_active`*8+`q~Group_very_low_active`*64)/sqrt(`i~i`+`T0~~T0`/5+`T2~~T2`/5+`  
T4~~T4`/5+`T6~~T6`/5+`T8~~T8`/5)"),
```

```

deltaMethod(coef(Dep_model_quad_PP_compcon), level = 0.95, vcov.=vcov(Dep_model_quad_PP_compcon),
  "(^s~Group_very_low_active`*10+`q~Group_very_low_active`*100)/sqrt(`i~~i`+`T0~~T0`/6+`T2~~T2`/6
+`T4~~T4`/6+`T6~~T6`/6+`T8~~T8`/6+`T10~~T10`/6)"),
deltaMethod(coef(Dep_model_quad_PP_compcon), level = 0.95, vcov.=vcov(Dep_model_quad_PP_compcon),
  "(^s~Group_very_low_active`*12+`q~Group_very_low_active`*144)/sqrt(`i~~i`+`T0~~T0`/7+`T2~~T2`/7
+`T4~~T4`/7+`T6~~T6`/7+`T8~~T8`/7+`T10~~T10`/7+`T12~~T12`/7)"),
deltaMethod(coef(Dep_model_quad_PP_compcon), level = 0.95, vcov.=vcov(Dep_model_quad_PP_compcon),
  "(^s~Group_low_active`*2+`q~Group_low_active`*4)/sqrt(`i~~i`+`T0~~T0`/2+`T2~~T2`/2)"),
deltaMethod(coef(Dep_model_quad_PP_compcon), level = 0.95, vcov.=vcov(Dep_model_quad_PP_compcon),
  "(^s~Group_low_active`*4+`q~Group_low_active`*16)/sqrt(`i~~i`+`T0~~T0`/3+`T2~~T2`/3+`T4~~T4`/3
)"),
deltaMethod(coef(Dep_model_quad_PP_compcon), level = 0.95, vcov.=vcov(Dep_model_quad_PP_compcon),
  "(^s~Group_low_active`*6+`q~Group_low_active`*36)/sqrt(`i~~i`+`T0~~T0`/4+`T2~~T2`/4+`T4~~T4`/4
+`T6~~T6`/4)"),
deltaMethod(coef(Dep_model_quad_PP_compcon), level = 0.95, vcov.=vcov(Dep_model_quad_PP_compcon),
  "(^s~Group_low_active`*8+`q~Group_low_active`*64)/sqrt(`i~~i`+`T0~~T0`/5+`T2~~T2`/5+`T4~~T4`/5+
+`T6~~T6`/5+`T8~~T8`/5)"),
deltaMethod(coef(Dep_model_quad_PP_compcon), level = 0.95, vcov.=vcov(Dep_model_quad_PP_compcon),
  "(^s~Group_low_active`*10+`q~Group_low_active`*100)/sqrt(`i~~i`+`T0~~T0`/6+`T2~~T2`/6+`T4~~T4`/
6+`T6~~T6`/6+`T8~~T8`/6+`T10~~T10`/6)"),
deltaMethod(coef(Dep_model_quad_PP_compcon), level = 0.95, vcov.=vcov(Dep_model_quad_PP_compcon),
  "(^s~Group_low_active`*12+`q~Group_low_active`*144)/sqrt(`i~~i`+`T0~~T0`/7+`T2~~T2`/7+`T4~~T4`/
7+`T6~~T6`/7+`T8~~T8`/7+`T10~~T10`/7+`T12~~T12`/7)"),
deltaMethod(coef(Dep_model_quad_PP_compcon), level = 0.95, vcov.=vcov(Dep_model_quad_PP_compcon),
  "(^s~Group_high_active`*2+`q~Group_high_active`*4)/sqrt(`i~~i`+`T0~~T0`/2+`T2~~T2`/2)"),
deltaMethod(coef(Dep_model_quad_PP_compcon), level = 0.95, vcov.=vcov(Dep_model_quad_PP_compcon),
  "(^s~Group_high_active`*4+`q~Group_high_active`*16)/sqrt(`i~~i`+`T0~~T0`/3+`T2~~T2`/3+`T4~~T4`/3
)"),
deltaMethod(coef(Dep_model_quad_PP_compcon), level = 0.95, vcov.=vcov(Dep_model_quad_PP_compcon),
  "(^s~Group_high_active`*6+`q~Group_high_active`*36)/sqrt(`i~~i`+`T0~~T0`/4+`T2~~T2`/4+`T4~~T4`/4
+`T6~~T6`/4)"),
deltaMethod(coef(Dep_model_quad_PP_compcon), level = 0.95, vcov.=vcov(Dep_model_quad_PP_compcon),
  "(^s~Group_high_active`*8+`q~Group_high_active`*64)/sqrt(`i~~i`+`T0~~T0`/5+`T2~~T2`/5+`T4~~T4`/5
+`T6~~T6`/5+`T8~~T8`/5)"),
deltaMethod(coef(Dep_model_quad_PP_compcon), level = 0.95, vcov.=vcov(Dep_model_quad_PP_compcon),
  "(^s~Group_high_active`*10+`q~Group_high_active`*100)/sqrt(`i~~i`+`T0~~T0`/6+`T2~~T2`/6+`T4~~T4`
/6+`T6~~T6`/6+`T8~~T8`/6+`T10~~T10`/6)"),
deltaMethod(coef(Dep_model_quad_PP_compcon), level = 0.95, vcov.=vcov(Dep_model_quad_PP_compcon),
  "(^s~Group_high_active`*12+`q~Group_high_active`*144)/sqrt(`i~~i`+`T0~~T0`/7+`T2~~T2`/7+`T4~~T4`
/7+`T6~~T6`/7+`T8~~T8`/7+`T10~~T10`/7+`T12~~T12`/7)"))>%
mutate(Group = c(rep("Very low", 6),rep("Low", 6), rep("High", 6)),
  Week = rep(c(2,4,6,8,10,12),3))>%tibble()

```

### Software description.

All analyses, descriptive statistics, multiple imputation, and visualisations were run using R Statistical software (Version 4.1.0)<sup>1</sup>. Growth models were completed using the *lavaan* package<sup>2</sup>. Data cleaning and visualization were completed within the *tidyverse* framework,<sup>3</sup> with *dplyr*<sup>4</sup> and *ggplot* specifically.<sup>5</sup> The effect size calculations for the growth curves used the *deltaMethod* function from the *car6* package and the effect size for the Wilcoxon test used the *rstatix* package.<sup>7</sup>

### References

1. R Core Team. R: A language and environment for statistical computing. R Foundation for Statistical Computing 2021; Vienna(Austria).
2. Rosseel Y. lavaan: An R package for structural equation modeling. Journal of statistical software 2012; 48: 1-36.
3. Wickham H, Averick M, Bryan J, et al. Welcome to the Tidyverse. Journal of open source software 2019; 4(43): 1686.
4. Wickham H, François R, Henry L, Muller K. dplyr: A Grammar of Data Manipulation. R package version 1010 2022: <https://CRAN.R-project.org/package=dplyr>.
5. Wickham H. ggplot2: Elegant Graphics for Data Analysis: Springer New York; 2009.
6. Fox J, Weisberg S. An R Companion to Applied Regression: SAGE Publications; 2018.
7. Kassambara A. rstatix: Pipe-Friendly Framework for Basic Statistical Tests. R package version 0.7.1.

## eTables and eFigures

**eTable 1.** Missingness for Outcome Scales

| Week                     | Depressive Symptoms |                   | Cynicism           |                   | Emotional Exhaustion |                   | Professional Efficacy |                   |
|--------------------------|---------------------|-------------------|--------------------|-------------------|----------------------|-------------------|-----------------------|-------------------|
|                          | Completely Missing  | Partially Missing | Completely Missing | Partially Missing | Completely Missing   | Partially Missing | Completely Missing    | Partially Missing |
| <b>0</b>                 | 2                   | 0                 | 2                  | 1                 | 2                    | 0                 | 2                     | 0                 |
| <b>2</b>                 | 20                  | 0                 | 21                 | 0                 | 21                   | 0                 | 21                    | 0                 |
| <b>4</b>                 | 30                  | 1                 | 32                 | 1                 | 32                   | 2                 | 32                    | 3                 |
| <b>6</b>                 | 48                  | 0                 | 49                 | 2                 | 48                   | 1                 | 48                    | 2                 |
| <b>8</b>                 | 60                  | 0                 | 63                 | 1                 | 62                   | 0                 | 62                    | 2                 |
| <b>10</b>                | 71                  | 0                 | 71                 | 0                 | 71                   | 0                 | 71                    | 1                 |
| <b>12</b>                | 73                  | 0                 | 75                 | 1                 | 75                   | 0                 | 75                    | 0                 |
| <b>Total</b>             | 304                 | 1                 | 313                | 6                 | 311                  | 3                 | 311                   | 8                 |
| <b>Percent of sample</b> | 15.1%               | 0.0%              | 15.5%              | 0.3%              | 15.4%                | 0.1%              | 15.4%                 | 0.4%              |

Note. Fully missing denotes a response in which a participant did not respond to any of the items within an instrument. Partially missing denotes responses in which participants were missing at least one, but not all, responses to items on an instrument. Imputation was only done if a participant had partially missing data. The 'Percent of Sample' Row represents number missing (either partially or fully) divided by 2016, which is the total number of surveys sent to participants (N = 288 over 7 timepoints)

**eTable 2.** Predicting Number of Missing Surveys per Participant From Baseline Outcome and Sociodemographic Data

|                                                               | Predictor Statistics |              |               |               | Model Statistics   |              |
|---------------------------------------------------------------|----------------------|--------------|---------------|---------------|--------------------|--------------|
|                                                               | Beta                 | SE           | Lower CI      | Upper CI      | Adj R <sup>2</sup> | P value      |
| <b>BL Depression</b>                                          | 0.041                | 0.034        | -0.026        | 0.108         | 0.003              | 0.226        |
| <b>BL Cynicism</b>                                            | 0.019                | 0.021        | -0.023        | 0.060         | -0.002             | 0.377        |
| <b>BL Efficacy</b>                                            | 0.018                | 0.029        | -0.039        | 0.075         | -0.004             | 0.529        |
| <b>BL Exhaustion</b>                                          | 0.022                | 0.023        | -0.023        | 0.067         | 0.000              | 0.336        |
| <b>Age</b>                                                    | <b>-0.063</b>        | <b>0.015</b> | <b>-0.093</b> | <b>-0.033</b> | <b>0.103</b>       | <b>0.000</b> |
| <b>Gender (Categorical; Comparison Man)</b>                   |                      |              |               |               | 0.018              | 0.145        |
| <b>Non-Binary</b>                                             | 2.316                | 1.455        | -0.561        | 5.192         |                    |              |
| <b>Prefer not to Answer</b>                                   | -1.684               | 2.008        | -5.654        | 2.286         |                    |              |
| <b>Women</b>                                                  | -0.515               | 0.484        | -1.471        | 0.442         |                    |              |
| <b>Education (Categorical; Comparison: Trade Certificate)</b> |                      |              |               |               | -0.023             | 0.921        |
| <b>College Certificate</b>                                    | 0.250                | 0.956        | -1.640        | 2.140         |                    |              |
| <b>University Diploma</b>                                     | 0.111                | 1.052        | -1.970        | 2.192         |                    |              |
| <b>Bachelors</b>                                              | 0.161                | 0.854        | -1.527        | 1.849         |                    |              |
| <b>Degree above Bachelor's</b>                                | 0.489                | 0.866        | -1.222        | 2.201         |                    |              |
| <b>Household Income*</b>                                      | <b>-0.080</b>        | <b>0.030</b> | <b>-0.139</b> | <b>-0.021</b> | <b>0.048</b>       | <b>0.008</b> |
| <b>Health Care Role (Direct/Indirect)</b>                     | 0.033                | 0.432        | -0.821        | 0.887         | -0.007             | 0.939        |
|                                                               |                      |              |               |               |                    |              |

Notes. BL = Baseline; \*Converted to Numeric level (i.e. 1-28); Outcome is the number of Fully Missing Surveys; Bold Italics denotes significance (p<0.05)

**eTable 3.** Biweekly Feingold Treatment Effect Sizes and 95% CIs for Depressive (Primary Outcome) and Burnout Symptoms (Secondary Outcome), Covarying the Effects of Age

|                                             | <b>Week 2</b>            | <b>Week 4</b>            | <b>Week 6</b>            | <b>Week 8</b>            | <b>Week 10</b>           | <b>Week 12</b>           |
|---------------------------------------------|--------------------------|--------------------------|--------------------------|--------------------------|--------------------------|--------------------------|
| <b>Primary Outcome</b>                      |                          |                          |                          |                          |                          |                          |
| <b>Depressive Symptoms</b><br>ES (CI 95%)   | -0.10<br>(-0.21, 0.02)   | -0.18<br>(-0.37, -0.01)  | -0.26*<br>(-0.49, -0.03) | -0.32*<br>(-0.56, -0.07) | -0.37*<br>(-0.62, -0.12) | -0.41*<br>(-0.69, -0.13) |
| <b>Secondary Outcomes</b>                   |                          |                          |                          |                          |                          |                          |
| <b>Burnout Symptoms</b>                     |                          |                          |                          |                          |                          |                          |
| <i>Cynicism</i><br>ES (CI 95%)              | -0.10*<br>(-0.18, -0.01) | -0.18*<br>(-0.32, -0.04) | -0.24*<br>(-0.41, -0.07) | -0.29*<br>(-0.46, -0.11) | -0.32*<br>(-0.50, -0.14) | -0.33*<br>(-0.54, -0.13) |
| <i>Emotional Exhaustion</i><br>ES (CI 95%)  | -0.13*<br>(-0.23, -0.03) | -0.23*<br>(-0.40, -0.06) | -0.31*<br>(-0.51, -0.10) | -0.36*<br>(-0.58, -0.13) | -0.38*<br>(-0.61, -0.15) | -0.39*<br>(-0.64, -0.13) |
| <i>Professional Efficacy</i><br>ES (CI 95%) | 0.09<br>(-0.01, 0.20)    | 0.16<br>(-0.01, 0.34)    | 0.20*<br>(0.00, 0.40)    | 0.22*<br>(0.00, 0.43]    | 0.21<br>(-0.01, 0.43)    | 0.17<br>(-0.07, 0.42)    |

Notes. ES = Effect Size; CI = Confidence Interval; \* designates significant effects ( $p < 0.05$ ).



**eTable 4.** Biweekly Feingold Treatment Effect Sizes and 95% CIs for Depressive (Primary Outcome) and Burnout Symptoms (Secondary Outcome), Covarying the Effects of Income

|                                             | <b>Week 2</b>           | <b>Week 4</b>            | <b>Week 6</b>            | <b>Week 8</b>            | <b>Week 10</b>           | <b>Week 12</b>           |
|---------------------------------------------|-------------------------|--------------------------|--------------------------|--------------------------|--------------------------|--------------------------|
| <b>Primary Outcome</b>                      |                         |                          |                          |                          |                          |                          |
| <b>Depressive Symptoms</b><br>ES (CI 95%)   | -0.08<br>(-0.20, 0.04)  | -0.16<br>(-0.36, 0.05)   | -0.22<br>(-0.47, 0.03)   | -0.27*<br>(-0.53, -0.01) | -0.32*<br>(-0.58, -0.05) | -0.35*<br>(-0.65, -0.05) |
| <b>Secondary Outcomes</b>                   |                         |                          |                          |                          |                          |                          |
| <b>Burnout Symptoms</b>                     |                         |                          |                          |                          |                          |                          |
| <i>Cynicism</i><br>ES (CI 95%)              | -0.08<br>(-0.17, 0.01)  | -0.15*<br>(-0.29, -0.01) | -0.21*<br>(-0.38, -0.03) | -0.25*<br>(-0.44, -0.07) | -0.29*<br>(-0.49, -0.10) | -0.32*<br>(-0.54, -0.10) |
| <i>Emotional Exhaustion</i><br>ES (CI 95%)  | -0.10*<br>(-0.20, 0.00) | -0.19*<br>(-0.35, -0.02) | -0.25*<br>(-0.45, -0.06) | -0.31*<br>(-0.52, -0.09) | -0.34*<br>(-0.56, -0.11) | -0.35*<br>(-0.61, -0.10) |
| <i>Professional Efficacy</i><br>ES (CI 95%) | 0.11*<br>(0.01, 0.22)   | 0.18*<br>(0.02, 0.35)    | 0.21*<br>(0.02, 0.41)    | 0.22*<br>(0.00, 0.43]    | 0.18<br>(-0.05, 0.41)    | 0.11<br>(-0.16, 0.38)    |

Notes. ES = Effect Size; CI = Confidence Interval; \* designates significant effects ( $p < 0.05$ ).

**eTable 5.** Weekly Use of Down Dog Apps for All Exercise Condition Participants and by Average Adherence Group Over the Course of the Intervention

|                                         | Group    | Week 1            | Week 2            | Week 3            | Week 4           | Week 5            | Week 6            | Week 7            | Week 8           | Week 9           | Week 10          | Week 11          | Week 12          |
|-----------------------------------------|----------|-------------------|-------------------|-------------------|------------------|-------------------|-------------------|-------------------|------------------|------------------|------------------|------------------|------------------|
| <b>Number of Sessions per Week (SD)</b> | All      | 3.92<br>(2.19)    | 3.24<br>(1.96)    | 2.85<br>(1.97)    | 2.71<br>(2.02)   | 2.33<br>(1.96)    | 2.54<br>(2.11)    | 2.36<br>(2.24)    | 2.22<br>(2.16)   | 2.09<br>(2.07)   | 1.86<br>(1.97)   | 2.96<br>(2.06)   | 1.56<br>(1.94)   |
|                                         | High     | 4.8<br>(1.32)     | 4.6<br>(1)        | 4.93<br>(1.05)    | 4.67<br>(1.24)   | 4.4<br>(1.35)     | 4.5<br>(1.38)     | 4.83<br>(1.86)    | 4.63<br>(1.4)    | 4.3<br>(1.29)    | 4.1<br>(1.06)    | 4.13<br>(1.8)    | 3.83<br>(1.8)    |
|                                         | Low      | 4.52<br>(2.02)    | 3.63<br>(1.79)    | 3.21<br>(1.37)    | 3.07<br>(1.6)    | 2.55<br>(1.56)    | 2.89<br>(1.78)    | 2.51<br>(1.73)    | 2.34<br>(1.82)   | 2.19<br>(1.82)   | 1.86<br>(1.8)    | 2.07<br>(1.72)   | 1.41<br>(1.6)    |
|                                         | Very Low | 2.03<br>(1.96)    | 1.38<br>(1.48)    | 0.46<br>(0.77)    | 0.43<br>(0.73)   | 0.22<br>(0.48)    | 0.27<br>(0.77)    | 0.08<br>(0.36)    | 0.03<br>(0.16)   | 0.11<br>(0.66)   | 0.03<br>(0.66)   | 0<br>(0)         | 0<br>(0)         |
| <b>Minute per Week (SD)</b>             | All      | 73.27<br>(41.49)  | 65.79<br>(42.87)  | 57.12<br>(42.43)  | 56.49<br>(45.60) | 49.80<br>(46.28)  | 52.51<br>(46.56)  | 49.72<br>(48.94)  | 48.29<br>(51.14) | 44.45<br>(48.02) | 39.93<br>(46.58) | 42.96<br>(47.96) | 34.71<br>(45.98) |
|                                         | High     | 100.94<br>(32.85) | 104.77<br>(36.33) | 107.98<br>(31.92) | 109.5<br>(39.07) | 108.28<br>(43.58) | 104.39<br>(36.03) | 111.38<br>(43.32) | 115.3<br>(44.78) | 105.6<br>(41.69) | 99.75<br>(40.91) | 98<br>(50.42)    | 95.28<br>(46.45) |
|                                         | Low      | 82.44<br>(34.73)  | 71.41<br>(32.19)  | 60.94<br>(25.8)   | 59.81<br>(29.74) | 48.78<br>(28.89)  | 55.98<br>(35.34)  | 48.76<br>(32.67)  | 44.95<br>(34.37) | 41.28<br>(34.58) | 35.33<br>(34.61) | 42.11<br>(34.72) | 27.4<br>(31.79)  |
|                                         | Very Low | 32.76<br>(29.51)  | 23.1<br>(27.53)   | 8.34<br>(12.96)   | 6.95<br>(11.94)  | 4.4<br>(10.04)    | 3.59<br>(10.02)   | 1.62<br>(7.27)    | 0.54<br>(3.29)   | 1.15<br>(7)      | 0.49<br>(2.96)   | 0<br>(0)         | 0<br>(0)         |

*Per protocol indicates 80+ minutes (N = 30); low: 20-79 minutes (N = 73); and very low: <20 minutes (N = 37).*

**eTable 6.** Predicting Average Weekly Minutes of App Use per Participant From Baseline Outcome and Sociodemographic Data

|                                                               | Predictor Statistics |              |              |              | Model Statistics   |              |
|---------------------------------------------------------------|----------------------|--------------|--------------|--------------|--------------------|--------------|
|                                                               | Beta                 | SE           | Lower CI     | Upper CI     | Adj R <sup>2</sup> | P value      |
| <b>BL Depression</b>                                          | 0.156                | 0.684        | -1.196       | 1.509        | -0.007             | 0.820        |
| <b>BL Cynicism</b>                                            | -0.180               | 0.418        | -1.007       | 0.646        | -0.006             | 0.667        |
| <b>BL Efficacy</b>                                            | -0.571               | 0.574        | -1.707       | 0.564        | 0.000              | 0.322        |
| <b>BL Exhaustion</b>                                          | 0.247                | 0.460        | -0.662       | 1.155        | -0.005             | 0.592        |
| <b>Age</b>                                                    | <b>0.950</b>         | <b>0.312</b> | <b>0.334</b> | <b>1.567</b> | <b>0.057</b>       | <b>0.003</b> |
| <b>Gender (Categorical; Comparison Man)</b>                   |                      |              |              |              | -0.014             | 0.761        |
| <b>Non-Binary</b>                                             | -39.065              | 40.466       | -119.101     | 40.970       |                    |              |
| <b>Prefer not to Answer</b>                                   | -5.236               | 40.466       | -85.271      | 74.799       |                    |              |
| <b>Women</b>                                                  | 2.340                | 9.967        | -17.372      | 22.052       |                    |              |
| <b>Education (Categorical; Comparison: Trade Certificate)</b> |                      |              |              |              | 0.001              | 0.389        |
| <b>College Certificate</b>                                    | 15.376               | 18.718       | -21.646      | 52.399       |                    |              |
| <b>University Diploma</b>                                     | -4.746               | 20.607       | -45.507      | 36.014       |                    |              |
| <b>Bachelors</b>                                              | 19.645               | 16.742       | -13.469      | 52.760       |                    |              |
| <b>Degree above Bachelor's</b>                                | 12.609               | 16.951       | -20.919      | 46.137       |                    |              |
| <b>Household Income*</b>                                      | 0.872                | 0.570        | -0.258       | 2.001        | 0.011              | 0.129        |
| <b>Health Care Role (Direct/Indirect)</b>                     | 6.611                | 8.683        | -10.562      | 23.784       | -0.003             | 0.448        |
|                                                               |                      |              |              |              |                    |              |

Notes. BL = Baseline; \*Converted to Numeric level (i.e. 1-28); Outcome is the number of Fully Missing Surveys; Bold Italics denotes significance (p<0.05)

**eTable 7.** Within Condition Changes Over Time for Depressive Symptoms and for Burnout Symptoms (Cynicism, Exhaustion, Professional Efficacy)

|                              | Waitlist Control Condition (N = 146) |           |                | Exercise Condition (N = 142) |           |                |
|------------------------------|--------------------------------------|-----------|----------------|------------------------------|-----------|----------------|
| <b>Depressive Symptoms</b>   |                                      |           |                |                              |           |                |
|                              | <i>Estimate</i>                      | <i>SE</i> | <i>CI</i>      | <i>Estimate</i>              | <i>SE</i> | <i>CI</i>      |
| <b>I</b>                     | 20.827*                              | .442      | 19.960, 21.694 | 21.189*                      | 0.397     | 20.410, 21.968 |
| <b>S</b>                     | -0.247*                              | 0.117     | -0.477, -0.018 | -0.524*                      | 0.129     | -0.776, -0.272 |
| <b>Q</b>                     | 0.017                                | 0.009     | -0.001, 0.035  | 0.025*                       | 0.010     | 0.005, 0.046   |
| <b>Cynicism</b>              |                                      |           |                |                              |           |                |
|                              | <i>Estimate</i>                      | <i>SE</i> | <i>CI</i>      | <i>Estimate</i>              | <i>SE</i> | <i>CI</i>      |
| <b>I</b>                     | 17.529*                              | 0.616     | 16.321, 18.737 | 18.879*                      | 0.646     | 17.613, 20.145 |
| <b>S</b>                     | 0.393*                               | 0.117     | 0.164, 0.623   | -0.012                       | 0.143     | -0.293, 0.269  |
| <b>Q</b>                     | -0.019*                              | 0.010     | -0.039, 0.000  | -0.003                       | 0.011     | -0.025, 0.019  |
| <b>Exhaustion</b>            |                                      |           |                |                              |           |                |
|                              | <i>Estimate</i>                      | <i>SE</i> | <i>CI</i>      | <i>Estimate</i>              | <i>SE</i> | <i>CI</i>      |
| <b>I</b>                     | 23.420*                              | 0.626     | 22.193, 24.648 | 25.094*                      | 0.602     | 23.915, 26.273 |
| <b>S</b>                     | -0.217                               | 0.139     | -0.489, 0.055  | -0.762*                      | 0.174     | -1.103, -0.421 |
| <b>Q</b>                     | 0.011                                | 0.011     | -0.012, 0.033  | 0.035*                       | 0.013     | 0.009, 0.061   |
| <b>Professional Efficacy</b> |                                      |           |                |                              |           |                |
|                              | <i>Estimate</i>                      | <i>SE</i> | <i>CI</i>      | <i>Estimate</i>              | <i>SE</i> | <i>CI</i>      |
| <b>I</b>                     | 33.746*                              | 0.439     | 32.886, 34.605 | 33.060*                      | 0.470     | 32.139, 33.981 |
| <b>S</b>                     | -0.205                               | 0.136     | -0.470, 0.061  | 0.101                        | 0.116     | -0.127, 0.328  |
| <b>Q</b>                     | 0.004                                | 0.011     | -0.018, 0.025  | -0.014                       | 0.010     | -0.034, 0.006  |

Notes. Estimates, SE and 95% CI for intercept (I), slope (S) and quadratic (Q) terms, \* denotes significance (p < .05).

**eTable 8.** Biweekly Average Number of Sick Days

|                                             | <b>Week 2</b> | <b>Week 4</b> | <b>Week 6</b> | <b>Week 8</b> | <b>Week 10</b> | <b>Week 12</b> |
|---------------------------------------------|---------------|---------------|---------------|---------------|----------------|----------------|
| <b>All Participants Mean (SD)</b>           | 0.38 (1.24)   | 0.41 (1.29)   | 0.49 (1.17)   | 0.43 (1.37)   | 0.54 (1.49)    | 0.50 (1.33)    |
| <b>Exercise Condition Mean (SD)</b>         | 0.43 (1.50)   | 0.38 (1.14)   | 0.42 (1.16)   | 0.38 (1.52)   | 0.51 (1.62)    | 0.41 (1.31)    |
| <b>Waitlist Control Condition Mean (SD)</b> | 0.32 (0.95)   | 0.43 (1.42)   | 0.54 (1.19)   | 0.47 (1.23)   | 0.58 (1.36)    | 0.59 (1.35)    |

Notes. SD = Standard Deviation.

**eTable 9.** Biweekly Effect Sizes for Depressive Symptoms With Use of the Down Dog Apps Over the Course of the Intervention Compared With the Waitlist Control Condition (n = 146)

| <b>Depressive Symptoms</b> |                             |                           |                           |
|----------------------------|-----------------------------|---------------------------|---------------------------|
|                            | Per Protocol                | Low Use                   | Very low Use              |
| <b>Time</b>                | Estimate, SE [95% CI]       | Estimate, SE [95% CI]     | Estimate, SE [95% CI]     |
| <b>Week 2</b>              | -0.25*, 0.09 [-0.43, -0.08] | -0.05, 0.07 [-0.18, 0.08] | -0.02, 0.11 [-0.23, 0.20] |
| <b>Week 4</b>              | -0.45*, 0.16 [-0.76, -0.15] | -0.10, 0.11 [-0.32, 0.12] | -0.05, 0.19 [-0.42, 0.31] |
| <b>Week 6</b>              | -0.60*, 0.20 [-0.99, -0.21] | -0.14, 0.14 [-0.41, 0.12] | -0.10, 0.23 [-0.56, 0.36] |
| <b>Week 8</b>              | -0.69*, 0.22 [-1.12, -0.25] | -0.19, 0.14 [-0.47, 0.09] | -0.17, 0.26 [-0.68, 0.34] |
| <b>Week 10</b>             | -0.72*, 0.24 [-1.18, -0.26] | -0.23, 0.14 [-0.51, 0.04] | -0.25, 0.29 [-0.82, 0.31] |
| <b>Week 12</b>             | -0.71*, 0.26 [-1.21, -0.20] | -0.28, 0.16 [-0.60, 0.04] | -0.35, 0.34 [-1.02, 0.32] |

Notes. \* denotes significance (p < .05).

Per protocol indicates 80+ minutes (N = 30); low: 20-79 minutes (N = 73); and very low: <20 minutes (N = 37).

**eTable 10.** Biweekly Effect Sizes for Burnout Symptoms (Cynicism, Exhaustion, Professional Efficacy) With Use of the Down Dog Apps Compared With the Waitlist Control Condition (n = 146)

| <b>Cynicism</b>              |                              |                              |                              |
|------------------------------|------------------------------|------------------------------|------------------------------|
|                              | <b>Per Protocol</b>          | <b>Low Use</b>               | <b>Very low Use</b>          |
| <b>Time</b>                  | <b>Estimate, SE [95% CI]</b> | <b>Estimate, SE [95% CI]</b> | <b>Estimate, SE [95% CI]</b> |
| <b>Week 2</b>                | -0.17*, 0.06 [-0.29, -0.06]  | -0.09, 0.05 [-0.18, 0.00]    | -0.01, 0.10 [-0.20, 0.18]    |
| <b>Week 4</b>                | -0.31*, 0.10 [-0.51, -0.12]  | -0.17*, 0.08 [-0.33, -0.01]  | -0.02, 0.17 [-0.35, 0.31]    |
| <b>Week 6</b>                | -0.41*, 0.12 [-0.65, -0.17]  | -0.23*, 0.10 [-0.42, -0.04]  | -0.03, 0.20 [-0.42, 0.37]    |
| <b>Week 8</b>                | -0.46*, 0.13 [-0.72, -0.21]  | -0.28*, 0.10 [-0.48, -0.08]  | -0.03, 0.21 [-0.45, 0.38]    |
| <b>Week 10</b>               | -0.49*, 0.13 [-0.74, -0.23]  | -0.32*, 0.11 [-0.52, -0.11]  | -0.04, 0.20 [-0.43, 0.36]    |
| <b>Week 12</b>               | -0.47*, 0.13 [-0.72, -0.21]  | -0.34*, 0.13 [-0.58, -0.09]  | -0.04, 0.18 [-0.40, 0.32]    |
| <b>Exhaustion</b>            |                              |                              |                              |
|                              | <b>Per Protocol</b>          | <b>Low Use</b>               | <b>Very low Use</b>          |
| <b>Time</b>                  | <b>Estimate, SE [95% CI]</b> | <b>Estimate, SE [95% CI]</b> | <b>Estimate, SE [95% CI]</b> |
| <b>Week 2</b>                | -0.28*, 0.09 [-0.46, -0.10]  | -0.1, 0.06 [-0.21, 0.02]     | -0.02, 0.10 [-0.22, 0.18]    |
| <b>Week 4</b>                | -0.48*, 0.16 [-0.80, -0.17]  | -0.18, 0.10 [-0.37, 0.01]    | -0.04, 0.17 [-0.37, 0.29]    |
| <b>Week 6</b>                | -0.61*, 0.20 [-1.01, -0.22]  | -0.25*, 0.12 [-0.48, -0.02]  | -0.05, 0.21 [-0.46, 0.35]    |
| <b>Week 8</b>                | -0.67*, 0.22 [-1.10, -0.24]  | -0.31*, 0.12 [-0.55, -0.07]  | -0.07, 0.23 [-0.51, 0.38]    |
| <b>Week 10</b>               | -0.65*, 0.22 [-1.09, -0.21]  | -0.35*, 0.13 [-0.60, -0.10]  | -0.08, 0.24 [-0.54, 0.39]    |
| <b>Week 12</b>               | -0.57*, 0.22 [-1.01, -0.14]  | -0.39*, 0.15 [-0.68, -0.09]  | -0.09, 0.27 [-0.62, 0.45]    |
| <b>Professional Efficacy</b> |                              |                              |                              |
|                              | <b>Per Protocol</b>          | <b>Low Use</b>               | <b>Very low Use</b>          |
| <b>Time</b>                  | <b>Estimate, SE [95% CI]</b> | <b>Estimate, SE [95% CI]</b> | <b>Estimate, SE [95% CI]</b> |
| <b>Week 2</b>                | 0.22*, 0.07 [0.09, 0.36]     | 0.12*, 0.06 [0.00, 0.24]     | -0.14, 0.10 [-0.34, 0.07]    |
| <b>Week 4</b>                | 0.39*, 0.12 [0.16, 0.61]     | 0.20*, 0.10 [0.00, 0.39]     | -0.21, 0.17 [-0.55, 0.13]    |
| <b>Week 6</b>                | 0.48*, 0.14 [0.21, 0.75]     | 0.23*, 0.11 [0.00, 0.45]     | -0.23, 0.21 [-0.63, 0.17]    |
| <b>Week 8</b>                | 0.55*, 0.15 [0.25, 0.84]     | 0.23, 0.12 [-0.01, 0.46]     | -0.20, 0.22 [-0.63, 0.24]    |
| <b>Week 10</b>               | 0.55*, 0.16 [0.23, 0.87]     | 0.18, 0.13 [-0.07, 0.44]     | -0.11, 0.23 [-0.55, 0.33]    |
| <b>Week 12</b>               | 0.50*, 0.18 [0.14, 0.86]     | 0.10, 0.16 [-0.20, 0.41]     | 0.03, 0.24 [-0.44, 0.50]     |

Notes. \* denotes significance ( $p < .05$ )

Per protocol indicates 80+ minutes (N = 30); low: 20-79 minutes (N = 73); and very low: <20 minutes (N = 37).

**eFigure 1.** Biweekly Effect Sizes for Depressive Symptoms for Participants With Use of the Down Dog Apps Over the Course of the Intervention Compared With the Waitlist Control Condition (n = 146)

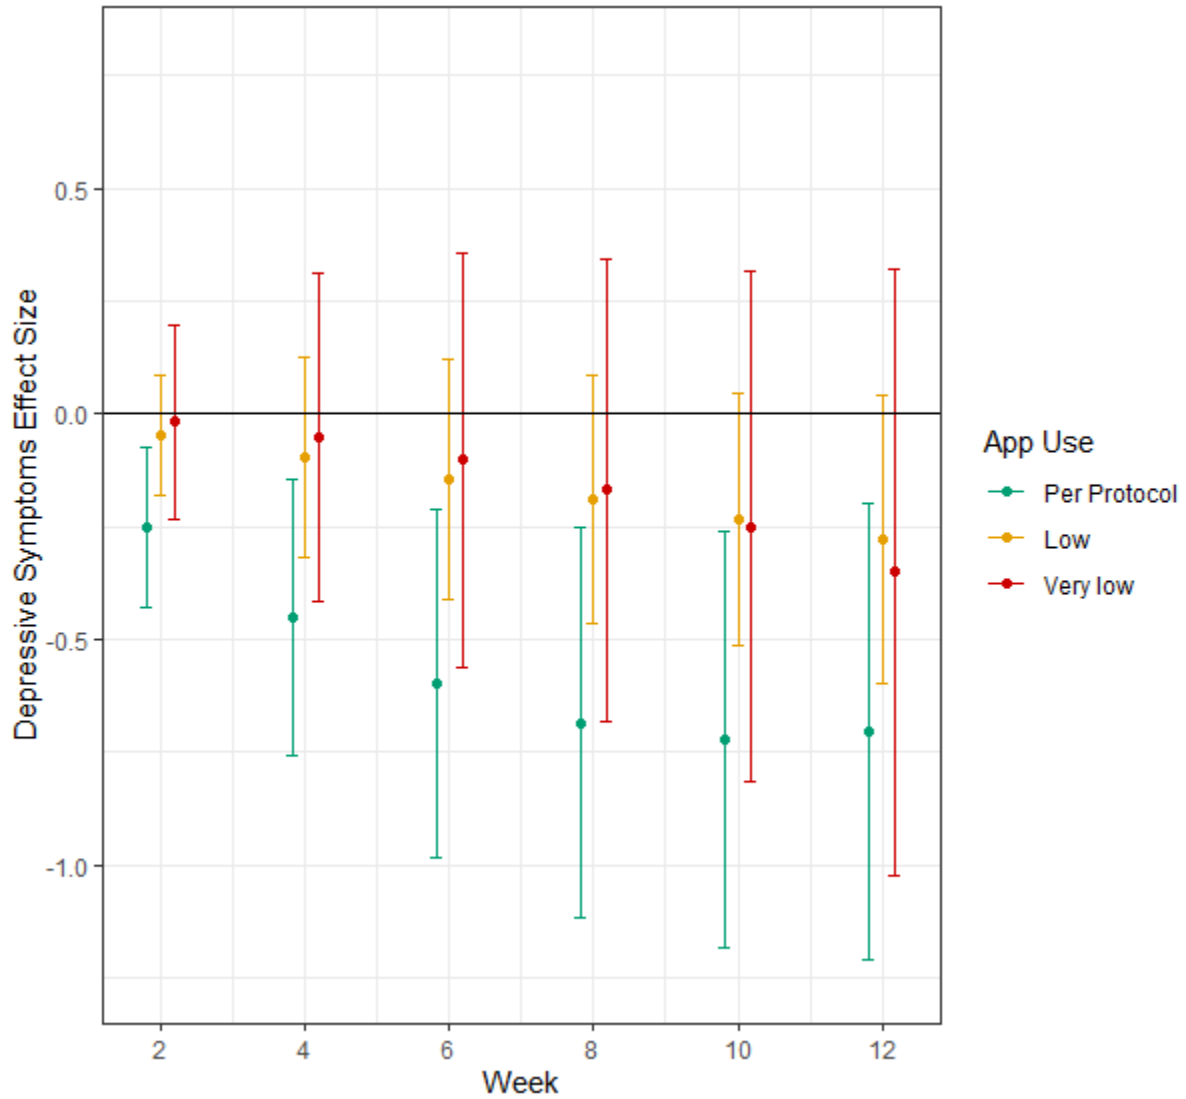

**Per protocol indicates 80+ minutes (N = 30); low: 20-79 minutes (N = 73); and very low: <20 minutes (N = 37).**



**eFigure 2.** Depressive Symptoms Trajectories for Participants With Use of the Down Dog Apps and Waitlist Control Condition Over the Course of the Intervention

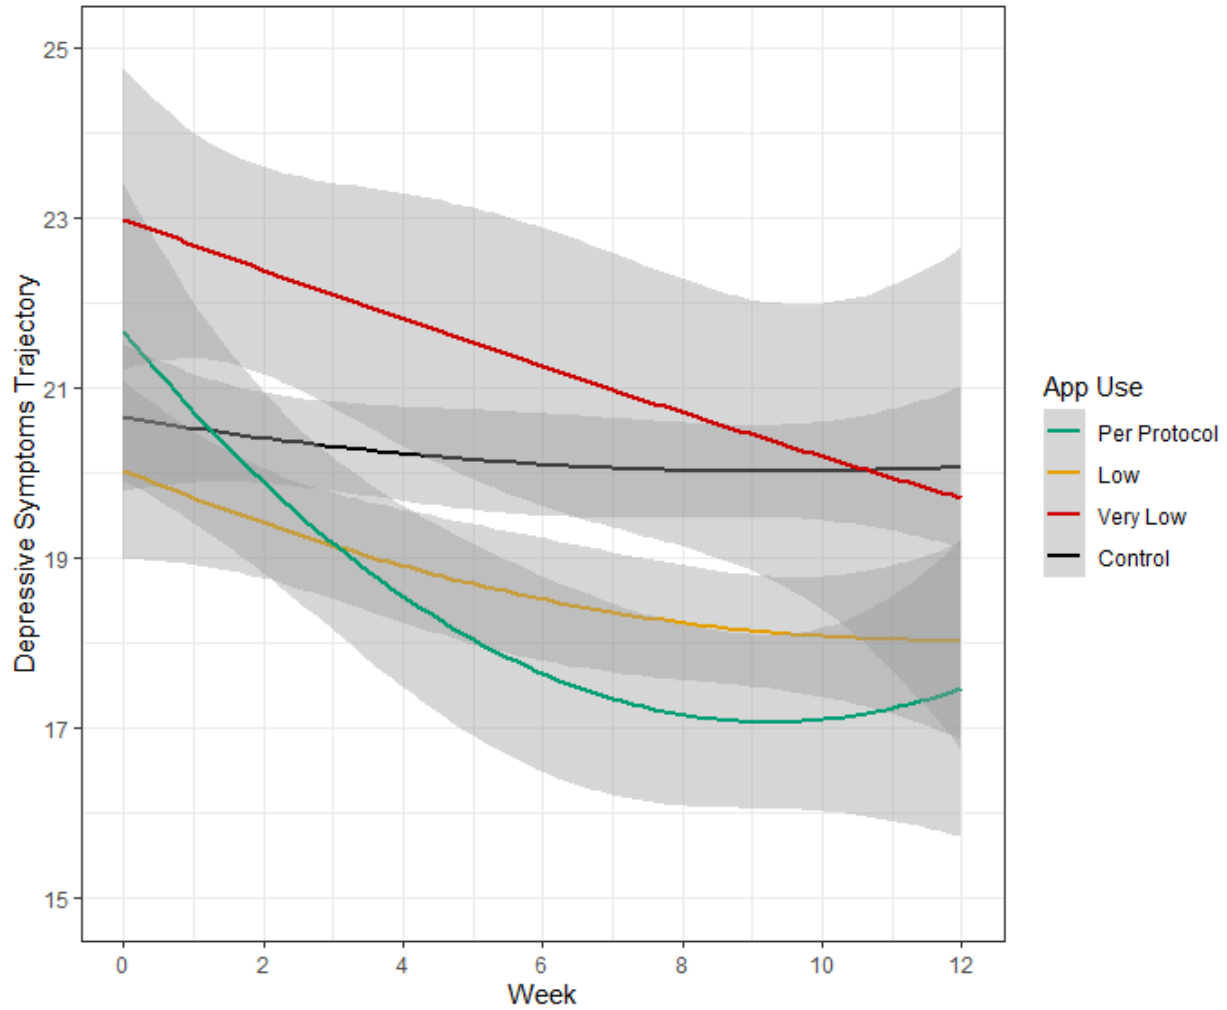

**Per protocol indicates 80+ minutes (N = 30); low: 20-79 minutes (N = 73); and very low: <20 minutes (N = 37).**

**eFigure 3.** Biweekly Effect Sizes for Burnout Symptoms (Cynicism, Exhaustion, Professional Efficacy) for Participants With Use of the Down Dog Apps Over the Course of the Intervention Compared With the Waitlist Control Condition (n = 146)

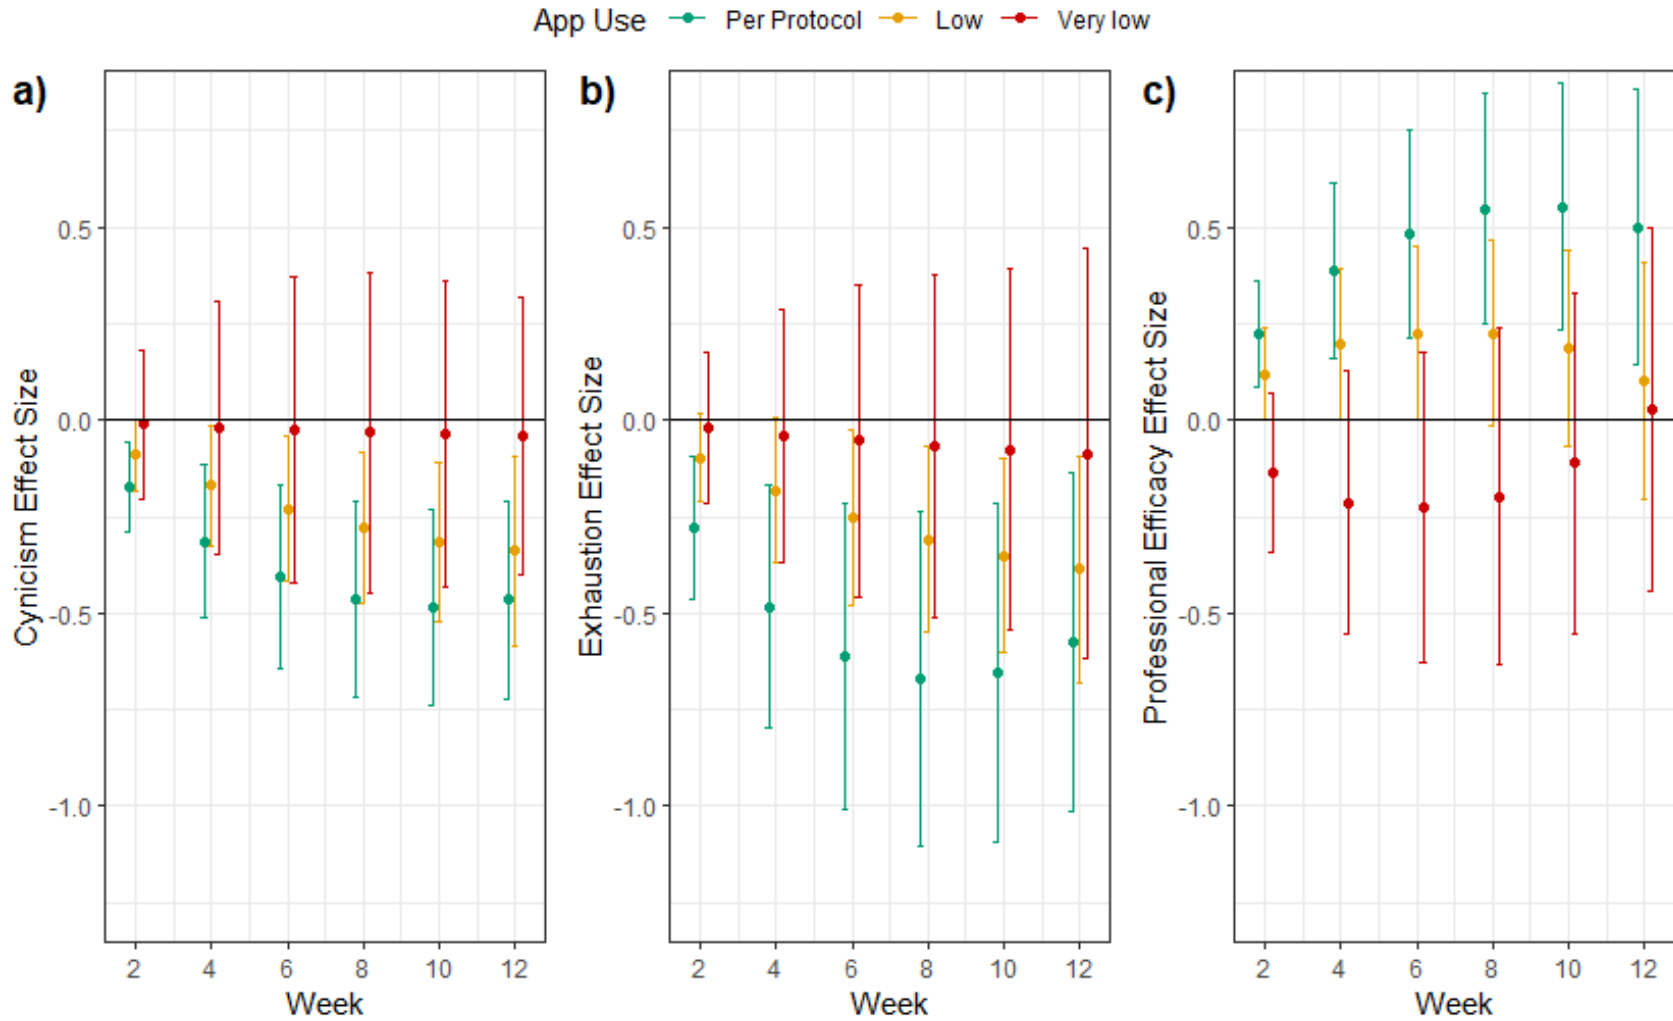

Per protocol indicates 80+ minutes (N = 30); low: 20-79 minutes (N = 73); and very low: <20 minutes (N = 37).

**eFigure 4.** Trajectories of Burnout Symptoms (Cynicism, Exhaustion, Professional Efficacy) for Participants With Use of the Down Dog Apps and Waitlist Control Condition Over the Course of the Intervention

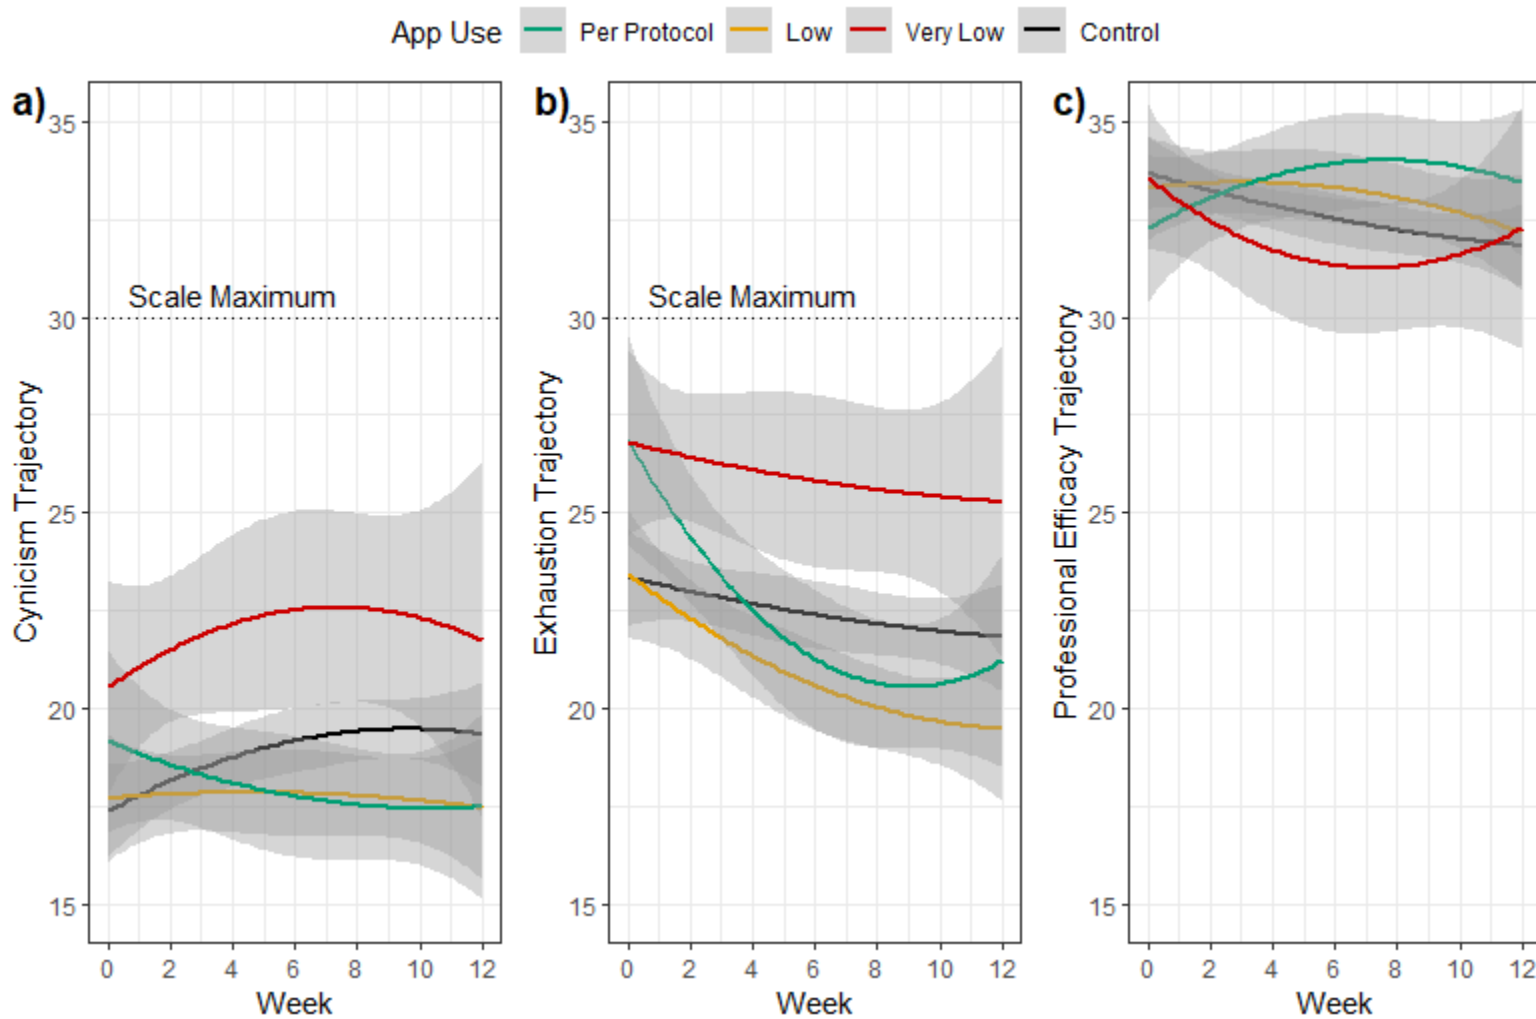

Per protocol indicates 80+ minutes (N = 30); low: 20-79 minutes (N = 73); and very low: <20 minutes (N = 37).
