# Supplementary material
Source: PubMed Central journal article supplement (PMC10413218)
Supplement: jamapsychiatry-e232706-s003.pdf [file jamapsychiatry-e232706-s003.pdf]

## Data Sharing Statement

Boucher. Effects of 12 Weeks of At-Home, Application-Based Exercise on Health Care Workers' Depressive Symptoms, Burnout, and Absenteeism. *JAMA Psychiatry*. Published August 09, 2023. doi:10.1001/jamapsychiatry.2023.2706

### Data

**Data available:** Yes

**Data types:** Data dictionary

**How to access data:** Data are available by contacting corresponding authors VGB or EP.

**When available:** With publication

### Supporting Documents

**Document types:** Statistical/analytic code, Informed consent form, Other (please specify)

**Additional Information:** Questionnaires; recruitment script; participant guide for the application

**How to access documents:** Can be accessed on OSF (link: <https://osf.io/8qfxh/>). Data are available by contacting corresponding authors VGB or EP.

**When available:** With publication

### Additional Information

**Who can access the data:** Anyone requesting the data. The corresponding investigator will evaluate the data requests.

**Types of analyses:** N/A

**Mechanisms of data availability:** With investigator support
